# Supplementary material for: A microtitre plate assay for the detection of antibiotics in porcine urine
Source: Royal Society of Chemistry journal article supplement (doi:10.1039/a909705h), 2000-01-01
Supplement: a909705h.doc [file a909705h.doc]

# Supplementary data

**A microtitre plate assay for the detection of antibiotics in porcine urine**

**Robert K. Buick*, Nuala M. Greer and Christopher T. Elliott**

Department of Agriculture for Northern Ireland, Veterinary Science Division, Stoney Road, Belfast, Northern Ireland, BT4 3SD

**Fig. 1** Inhibition of -D-glucopyranosidase activity by Penicillin G (Pen G).

**Fig. 2** Inhibition of -D-glucopyranosidase activity by Chlortetracycline (CTC).

**Fig. 3** Inhibition of -D-glucopyranosidase activity by Streptomycin (Strep).

**Fig. 4** Inhibition of -D-glucopyranosidase activity by Sulphamethazine (SMT).

**Fig. 5** Inhibition of -D-glucopyranosidase activity by Chloramphenicol (CMP).
