# Supplementary material for: A microtitre plate assay for the detection of antibiotics in porcine urine
Source: Royal Society of Chemistry journal article supplement (doi:10.1039/a909705h), 2000-01-01
Supplement: a909705h_5_figures.doc [file a909705h_5_figures.doc]

A microtitre plate assay for the detection of antibiotics in porcine urine

Robert K. Buick*, Nuala M. Greer and Christopher T. Elliott

Department of Agriculture for Northern Ireland, Veterinary Science Division, Stoney Road, Belfast., Northern Ireland, BT4 3SD

* Corresponding author

Summary

Techniques for screening porcine samples for antimicrobial residues in the EU usually involve analysis of samples taken post slaughter, and are either time consuming or expensive. Some of the positive test results at this screening stage could be avoided by allowing the animal sufficient withdrawal time following drug treatment. A method is described that can detect the presence of five major antibiotics in porcine urine at concentrations below 1g ml-1 for each of the compounds. The test uses *Bacillus subtilis*, which is already widely employed in antimicrobial inhibition assays, and when combined with a colourimetric substrate, -nitrophenyl -D glucopyranoside, can detect inhibitory substances within an assay time of four and a half hours. The method, which uses microtitre plate technology, could be developed into a convenient test kit for use at farm level to determine whether animals were still excreting antimicrobials in their urine prior to their submission for slaughter.

**Aims of study.**

Screening for antimicrobial residues in tissue is undertaken in Northern Ireland under European Union directives 86/469/EEC and 96/23/EC and the Animal Meat and Meat Products (Examination for residues and maximum residue limits) legislation (N.I. 1992). The microbial test currently employed is the EU four plate test1, which relies on the inhibition of growth on agar plates of either *Bacillus subtilis* or *Micrococcus luteus* by antimicrobials that diffuse from cored tissue samples applied to the plates.

Some miniaturised tests have also been produced to detect antimicrobials in animal matrices. Kits produced by Charm Sciences Inc.(Charm Sciences Inc. Malden, USA) are available to detect individual antibiotic groups using receptor and pH colour change methodology. However the cost of these kits is expensive when they are used within a screening regime and experience in this laboratory has indicated that results using colourimetric pH change methodology are not always consistent across different types and batches of animal matrices.

The majority of test procedures in current use are designed to screen post slaughter matrices for antimicrobial residues. A proportion of samples screening positive result from medicinally treated animals not being allowed sufficient withdrawal time before slaughter. Reports 2,3 state that while antimicrobial groups such as the  lactams, tetracyclines and streptomycins are mainly excreted from treated animals unchanged via urine, other drugs such as sulphamethazine and chloramphenicol are partly metabolised and both parent drug and metabolites are excreted via urine. Hence a simple pre-slaughter test that could detect whether animals were still excreting antimicrobials in their urine could indicate that sufficient amounts of drug remained within the animal to lead to a violative residue level failure. An overall reduction in the number of screening positive samples being detected could be achieved by waiting until urine levels were negative.

The use of enzyme cleavable colourimetric substrates to detect inhibition of microbial growth by various substances has been reported, and they are also routinely used in bacterial differentiation.4,5,6  The main test organism in the EU four plate test, *B. subtilis*, has various glycosidase enzyme systems 7 that could be monitored using appropriate substrates to indicate growth inhibition of the organism. In particular -glucopyranosidase will cleave the substrate -nitrophenyl -D glucopyranoside releasing -nitrophenol which can be measured colourimetrically.

This study aims to show that the presence of penicillin, chlortetracycline, sulphamethazine, streptomycin and chloramphenicol in urine can accurately, reliably and rapidly be detected in a miniaturised test by measuring the inhibition of -glucopyranosidase activity in *B. sublitis*.

**Experimental**

***Reagents***

*Chemicals*

Ammonium sulphate, dipotassium hydrogen orthophosphate, potassium dihydrogen orthophosphate, sodium citrate and magnesium sulphate (BDH Ltd., Lutterworth, UK) were all Analar grade material. Yeast extract (Difco, East Molesey, UK) was biological media grade. Penicillin G (Pen G), chlortetracycline (CTC), streptomycin (Strep.), sulphamethazine (SMT), chloramphenicol (CMP), trimethoprim and -nitrophenyl -D glucopyranoside were obtained from Sigma Ltd (Poole, UK).

*Culture*

*Bacillus subtilis* number 8054 (National collection of industrial and marine bacteria, Aberdeen, Scotland) was used as the test organism throughout this study.

*Growth media*

Bacillus growth medium (BM) was prepared consisting of 0.2g ammonium sulphate, 1.4g dipotassium hydrogen orthophosphate, 0.6g potassium dihydrogen orthophosphate, 0.1g sodium citrate, 0.02g magnesium sulphate and 0.01g yeast extract in 100ml deionised water. The medium was adjusted to pH 7.0 and sterilised by autoclaving. Double strength bacillus growth medium (DSBM) was also prepared by using twice the amounts of chemicals in the same volume of water.

*Stock antibiotic solutions*

Pen G, CTC, and Strep. were dissolved in deionised water at a concentration of 1mg ml-1. CMP was dissolved in a small amount of methanol before being added to deionised water to a final concentration of 1 mg ml-1. SMT was dissolved in molar hydrochloric acid before being added to deionised water to a final concentration of 1mg ml-1.

*Dilute standard solutions*

Fresh porcine urine obtained from pigs raised at an experimental farm (Agricultural Research Institute of Northern Ireland, Hillsborough, Northern Ireland), and known not to have been exposed to antibiotics, was used to dilute the stock antibiotic solutions. Standard solutions were prepared at concentrations that corresponded to 0, 0.25, 0.5, 1, 2, 4, 6, 8, and 10 times the Maximum Residue Limit (MRL) for each drug in animal tissue.

*Colourimetric substrate*

-nitrophenyl -D glucopyranoside was dissolved in deionised water to give a 10 mg ml-1 stock solution. The solution was sterilised by filtration through a 0.22m syringe filter (Whatman Ltd, Maidstone, UK).

***Apparatus***

Standard laboratory apparatus was used throughout for the preparation of media and chemical solutions. An incubator (Astell scientific, Sidcup, UK) was used to incubate the *B. subtilis* culture and the assay plate. A Biotek EL340 microtitre plate reader (Anachem, Luton, UK) was used to read colour development on the assay plates.

***Methodology***

*B. subtilis culture*

An exponentially growing culture of *B. subtilis* was maintained by daily inoculation with a 0.1ml aliquot of an overnight culture into 10ml of fresh BM and subsequent incubation at 37 0C.

*Assay conditions*

3.5ml of DSBM was added to 3.5ml of -nitrophenyl -D glucopyranoside substrate stock solution. A column of six wells of a microtitre assay plate (Becton Dickinson, Oxford, UK,) was filled with 175l aliquots of this inoculation media to act as media controls in the assay. To the remaining inoculation media was added 60l of the exponentially growing *B. subtilis* culture and further 175l aliquots were added to additional columns of microtitre wells. The assay was initiated by adding 25l sterile water to the blank wells and 25l of either negative urine (control) or dilute standard urine solutions (test), in replicate, to the other wells. The assay plate was sealed with microtitre plate sealing film and incubated for four and a half hours at 37 0C before the film was removed and the plate read at 405nm in the plate reader.

*Analysis*

The optical density data obtained were analysed and expressed as a percentage of the maximum optical density readings produced by the control samples (i.e. negative urine). The results were plotted graphically showing the relative change in optical density with increasing antibiotic concentration. Statistical analysis involved calculating the standard deviation within the replicates and the coefficient of variation between analyses.

**Results and discussion**

Figures 1 - 5 show clearly that the antibiotic spiked urine successfully inhibited the growth of *B. subtilis*, as demonstrated by the reduction in -D glucopyranosidase activity, over the ranges studied. While the graphs do not indicate the actual optical densities measured there was a significant range of colour difference between negative and test samples. On average there was a difference of 1.5 optical density units between the negative samples and samples containing the highest concentrations of antibiotic. During the course of the experimentation it was found that the addition of a 0.05% trimethoprim solution to the DSBM in the assay enhanced the response from the sulphamethazine spikes. The accuracy and reproducibility of the test was extremely good with standard deviations ranging from 0.1% - 6.0% over all concentration levels (n= 24) and coefficients of variation ranging from 5.4% - 15.7% (n=4). The test as described has been shown to be extremely sensitive and capable of detecting the antimicrobials studied at concentrations, ranging from 0.1 g ml-1 for Pen G to 1g ml-1 for SMT, in urine. While it is recognised that not all the antibiotics studied are excreted in parent form this study has demonstrated that, with some additional work on incurred samples and metabolites, the assay as described could form the basis of a rapid and reliable farm based test to determine whether the studied antimicrobials were still being excreted in porcine urine prior to the animals submission for slaughter.

References

1 R. Bogaerts and F. Wolf, *Die Fleischwirtschaff*, 1980, **60**, 672

2 Joint FAO/WHO Expert Committee on Food Additives, *Residues of some Veterinary Drugs in animals and food,* Monograph 41/2, Geneva, 1989

3 The European Agency for the evaluation of Medicinal Products, *Veterinary Medicines Evaluation Unit*, Maximum Residues Limits Summary Reports, London , 1998

4 S. Chand, I. Lusanzi, D. A. Veal, L. R. Williams and P. Karuso, *J. Antibiotics,* 1994, **47** (11), 1295

5 A. R. Quesada, A. Canedo, M. A. Morena and J. L. Ferandas-Puentes, *Lettrs. Appl. Micro.,* 1996, **22**, 303

6 M. Manofi, W. Kneifel, and S. Bascomb, *Micro. Rev.,* 1991, **55** (3), 335

7 P. Kampfer, R. Keuch, and W. Dott, *Can. J. Microbiol*., 1993, **39**, 808

Figure 1: Inhibition of -D-glucopyranosidase activity by Penicillin G (Pen G).

Figure 2: Inhibition of -D-glucopyranosidase activity by Chlortetracycline (CTC)

Figure 3: Inhibition of -D-glucopyranosidase activity by Streptomycin (Strep.)

Figure 4: Inhibition of -D-glucopyranosidase activity by Sulphamethazine (SMT.)

Figure 5: Inhibition of -D-glucopyranosidase activity by Chloramphenicol (CMP.)

Fig. 1 Inhibition of -D-glucopyranosidase activity by Penicillin G (Pen G).

Fig. 2 Inhibition of -D-glycopyranosidase activity by Chlortetracycline (CTC)

Fig. 3 Inhibition of -D-glucopyranosidase activity by Streptomycin (Strep.).

Fig. 4 Inhibition of -D-glucopyranosidase activity by Sulphamethazine (SMT.).

Fig. 5 Inhibition of -D-glucopyranosidase activity by Chloramphenicol (CMP.).
